# Supplementary material for: Mechanical, robust and conductive eco-friendly self-assembling hydrogel: a novel material for electromagnetic shielding
Source: Royal Society of Chemistry journal article supplement (doi:10.1039/d3nj04508k), 2023-01-01
Supplement: d3nj04508k1.pdf [file d3nj04508k1.pdf]

**Mechanical, Robust and Conductivity Self-Assembling Hydrogel,  
Novel Electromagnetic Shielding Material**

*Yuhuan Xu*<sup>1</sup>, *Meng Pei*<sup>1</sup>, *Xiao Zhan*<sup>1</sup>, *Hongwei Wang*<sup>1</sup>, *Daohai Zhang*<sup>12\*</sup>, *Shuhao  
Qin*<sup>12\*</sup>

1. School of Chemical Engineering of Guizhou Minzu University, Guizhou, Guiyang  
550025;

2. National Engineering Research Center for Compounding and Modification of  
Polymer Materials, Guizhou, Guiyang, 550014

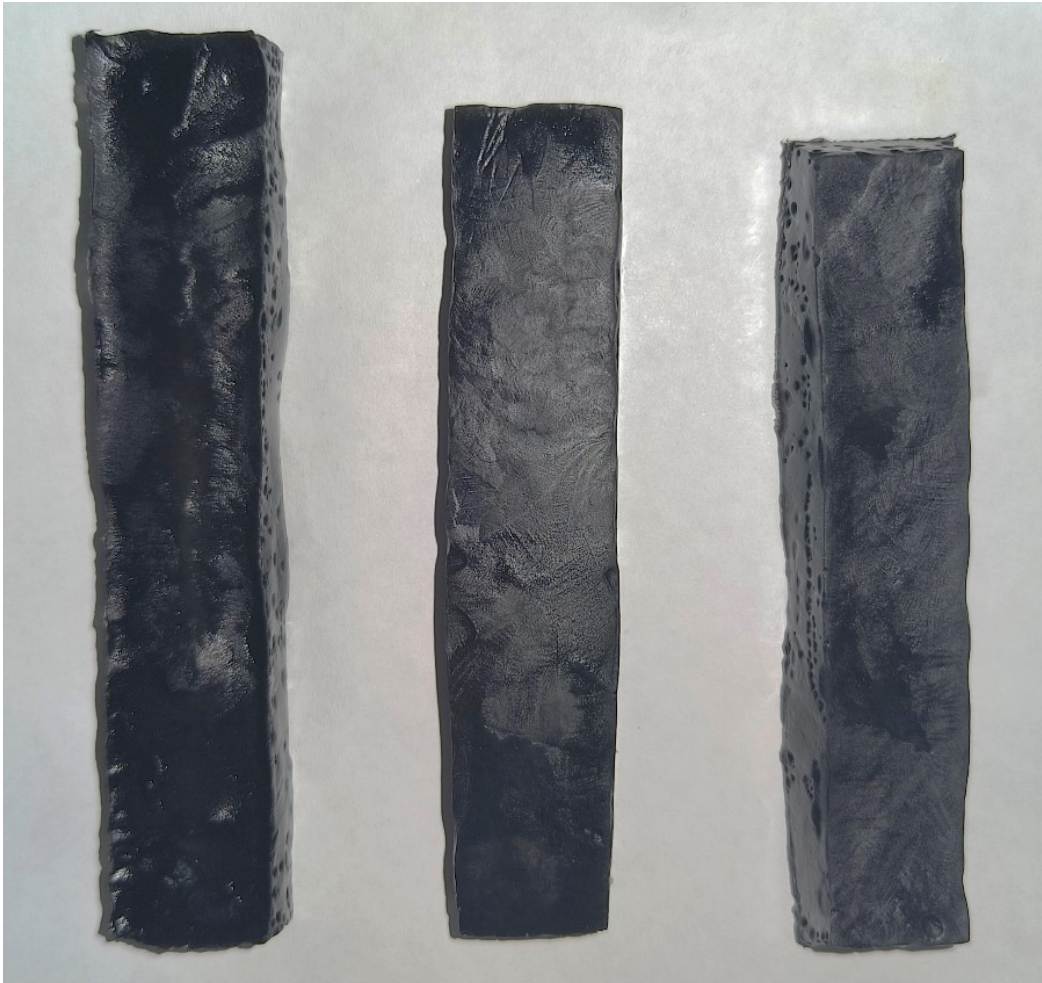

**Fig. S1.** Optical photograph of PPMS hydrogels

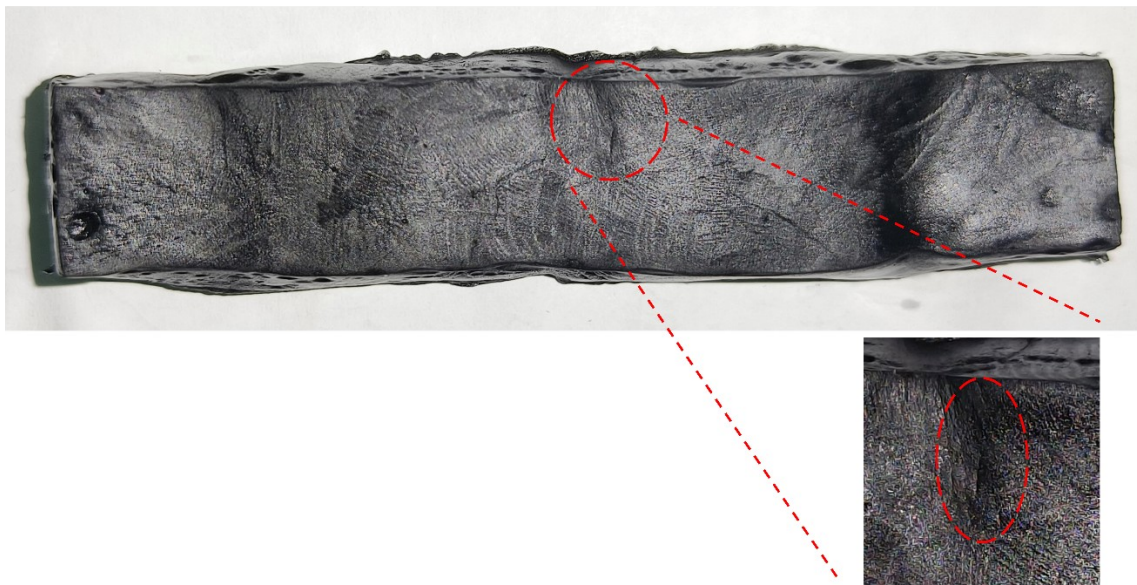

**Fig. S2.** Optical photograph of PPMS hydrogels
